# Supplementary material for: The interdependence of corporate reputation and ownership: a network approach to quantify reputation
Source: R Soc Open Sci. 2019 Oct 30;6(10):190570. doi: 10.1098/rsos.190570 (PMC6837230; doi:10.1098/rsos.190570)
Supplement: Data [file rsos190570supp1.csv]

id	control	revenue
1	7489652.3488	6874885
2	13497545.4665	4883182
3	2490393.9208	2214291
4	59450.6837	492595
5	47437.283	110628
6	24068.6611	71000
7	395920.0108	4456078
8	6678417.0987	5968787
9	166202.4567	270506
10	66812.8178	130947
11	112264.5015	2373801
12	1846269.1134	NA
13	1504681.8836	NA
14	1504681.8836	NA
15	18765524.8645	8656483
16	13555656.011	11042711
17	7882790.5746	7593687
18	1278454.9803	6861396
19	876720.0239	1775003
20	37177332.3143	1197193
21	709088.5163	782114
22	1340340.5343	705841
23	8825894.9922	689224
24	18970023.4166	678602
25	1361842.7188	660664
26	11521704.4862	309600
27	797747.0144	406971
28	259633.5197	339986
29	577200.3193	225733
30	57547.5405	222594
31	4731690.9386	186637
32	77682.5026	71482
33	12550.1904	40970
34	510930.354	31913
35	1668751.7462	26241
36	11891.0527	20000
37	164778.2337	16869
38	192886.0081	11523
39	107630.3763	9881
40	6147.6063	4744
41	1630373.7692	369
42	3898265.2509	NA
43	3157286.0513	15678915
44	44598813.604	17535693
45	1105713.1423	9136046
46	189557.2307	7436502
47	344870.2334	5357039
48	20913.0356	3638798
49	9454895.2637	3603714
50	7756895.0829	2952325
51	121603.5929	713603
52	1733186.4732	457263
53	44539137.6164	11821414
54	1213139.7764	381958
55	1274801.3638	381958
56	8499.3305	305676
57	8245905.1007	313082
58	23489.9762	159884
59	32886.1488	142763
60	9259570.7909	132040
61	5804082.6262	4092
62	1578643.0913	46603
63	641451.2964	31321
64	1338807.5595	6518
65	1077667.4831	12326
66	1886006.9246	490923
67	508443.0891	4440
68	833780.3504	4256
69	488253.1295	2950
70	3835782.3793	79180
71	87012.8552	1225
72	19106492.9686	3857105
73	45661686.3153	8366917
74	9064342.9877	-13567
75	172442.3109	51
76	16170468.8235	41
77	589219.4458	12
78	1350733.8001	11
79	775722.1904	7
80	5306638.565	9
81	835781.8158	4
82	47130.7225	3
83	1335801.7213	1
84	9284988.038	41
85	19078.649	NA
86	629973.8891	NA
87	617490.4215	NA
88	293198.7002	NA
89	1301005.0207	NA
90	1376169.9129	NA
91	4038.3506	NA
92	6493.6571	NA
93	1415065.5995	NA
94	9385143.4439	1925
95	26279429.0011	16559000
96	27303936.1662	12993000
97	11414726.5211	8654900
98	97266.1973	4000900
99	97652712.0614	1493500
100	734273.5635	416000
101	1196874.0504	31960
102	12443180.2353	12364577
103	53280721.4571	16394062
104	87853425.2035	16067965
105	115681628.128	25567665
106	174005.0564	16047370
107	208874449.225	12536686
108	1010467.3025	17069000
109	124915158.622	18381580
110	163407.803	13119368
111	57102909.9026	9983077
112	38070268.6189	8795589
113	81471519.5509	13060479
114	2391.5144	12572728
115	79129152.1581	8893738
116	32232345.544	10093525
117	7205313.3921	5460600
118	7385640.6886	3229211
119	13002573.7763	3424780
120	2716944.0548	2159272
121	2026706.4613	1294431
122	9436419.5995	813053
123	202624.35	737900
124	6242012.519	621000
125	6807420.407	618000
126	10047177.6763	589000
127	315701.2138	302483
128	26489493.992	619261
129	1343.548	488000
130	23950921.8561	315174
131	24291979.7007	220000
132	23950921.8561	209000
133	571356.4314	118632
134	310110.3117	99000
135	602275.9799	60396
136	132153224.834	72000
137	10027434.1953	42000
138	2673039.3881	42535
139	333642.2331	36000
140	221993.6164	24009
141	624484.1838	17594
142	19582312.994	14000
143	1840180.0648	7000
144	1506732.8302	3000
145	2391.5144	2000
146	71705675.9471	1000
147	333642.2331	NA
148	47924400.6432	NA
149	1549331.4232	NA
150	4809771.0718	NA
151	48846730.9291	46465000
152	626585393.849	38474965
153	423448353.754	28717528
154	61719321.3797	26111612
155	21067738.3859	25821519
156	15436410.7039	4747193
157	78861627.5267	2325576
158	136637.7994	1644186
159	8349483.067	1114881
160	1663435.1592	1037791
161	111101.4843	850304
162	6088.5566	791363
163	3449995.6161	771859
164	7380902.9415	690076
165	25536.4571	526788
166	538271.7184	519954
167	2081811.1545	495370
168	4782247.3298	463575
169	1768153.337	449187
170	2378820.4086	448988
171	1479568.864	349996
172	1892134.3082	327379
173	182733.5259	176339
174	1365992.2195	165615
175	1365992.2195	144719
176	1423392.3618	140030
177	206478.3358	34172
178	24865.1713	NA
179	6936.2746	NA
180	18295171.5049	92665
181	471156.3796	NA
182	220738364.363	201078625
183	125698067.133	110812898
184	84878463.7002	82228368
185	437218306.089	37032793
186	20044939.5681	20020784
187	2963.6906	636507
188	549311.5023	337943
189	11048213.5057	9707970
190	1392900.9134	8091663
191	341567535.865	85868563
192	5369779.353	4862110
193	13596324.6355	3767000
194	11589276.1641	3132886
195	1153701.6176	2654419
196	388042.9881	2004346
197	61913.956	1450678
198	492159.5727	1233505
199	5267605.2176	1000132
200	32955.9208	871461
201	44299.5931	777822
202	44138.8136	594363
203	2631.3679	419291
204	32955.909	331490
205	5149616.2383	20979191
206	55753926.7956	188309
207	2767.0599	173000
208	9751.6082	91062
209	283587.1074	8310286
210	55697941.9026	41000
211	12224315.4047	15465824
212	3507.7109	1000
213	5817798.524	137082
214	1315.6839	4
215	98752.8869	NA
216	118276138.8	819777
217	115963.3049	NA
218	1833963.3548	NA
219	10029690.6058	NA
220	37337794.0329	NA
221	2113686.1686	4955
222	2197386.3332	2016331
223	1116148.3688	3029
224	1063.2922	NA
225	3353.0121	NA
226	6706.0242	NA
227	329552.2971	4816937
228	65284.4337	2171474
229	532970.6001	1849467
230	105808750.632	5942315
231	73306220.7306	9205847
232	66821123.194	11256420
233	31110753.0268	11780061
234	14023061.225	NA
235	92547112.6044	49303306
236	4713953.6431	96141
237	58231482.9088	47099127
238	16210689.2916	6569047
239	77820615.6646	72540498
240	74721032.7089	71820097
241	104138989.064	30134993
242	26868782.3584	20279073
243	837842.2787	18724816
244	31.3371	16944949
245	17086291.5109	16520375
246	34342275.1355	19500252
247	17466816.3334	14819675
248	9494244.7077	7976675
249	711153.4775	7023518
250	18123557.2008	8979606
251	7301070.5665	7196821
252	4.9361	5792348
253	7799.3246	5324344
254	23113579.8359	6358046
255	5352410.267	4165811
256	93897.8197	2829712
257	3242.21	2720145
258	4200064.03	3703248
259	5236553.7713	2427104
260	13565.4421	2379996
261	4635284.066	4378946
262	1846.9452	2150011
263	19787.1006	2148360
264	314116.9531	1847359
265	9516.5056	1519931
266	1864848.1205	1861360
267	192500.969	1121073
268	1966039.1203	1111023
269	139.2759	995907
270	164278.4175	991844
271	18773.8764	506447
272	78354.1625	487949
273	4863.3636	264316
274	309480.8435	225442
275	312026.5575	253548
276	1675507.7054	260972
277	94754.5577	148117
278	922.8709	144835
279	6175.8174	125618
280	1945.3239	104712
281	139.2759	72800
282	26135.2027	65509
283	373356.4488	64683
284	16568.7699	60187
285	13674.8455	52285
286	1353083.7437	48729
287	139.2759	39378
288	362428.4831	38270
289	2706167.4833	35294
290	14938567.3951	20639
291	30208.0678	26709
292	33.0417	25221
293	1185647.8241	2203216
294	100905.2445	22197
295	8397.6413	18720
296	27701.8482	17946
297	717682.9246	15415
298	79721.6447	14644
299	121038.3678	13478
300	239880.4344	9032
301	309480.8435	8264
302	13934.7029	4963
303	1335199.0681	4332
304	7294.9907	4030
305	23066.4935	3963
306	7180167.4042	2320
307	279817.7649	2300
308	8690.4033	2260
309	10749388.8654	10404451
310	4863.3636	1000
311	6175.8174	1117
312	0.0086557	1006
313	415115.9533	779
314	148.2669	649
315	1.3851	393
316	75192.5385	180
317	85483.3946	95974
318	6725.0523	NA
319	21199.0467	NA
320	21765.4399	8
321	352.3294	8
322	8223.5352	2
323	357324.9078	NA
324	2143.9179	NA
325	1706.704	NA
326	1722.3318	NA
327	23321.8027	NA
328	6759.8951	NA
329	796276.6115	NA
330	460.8071	NA
331	3909.9108	1667
332	459.6798	NA
333	1706.704	NA
334	6256.2833	1621
335	80724.2903	3
336	58027.5182	NA
337	1655415.602	NA
338	15360.3927	NA
339	172150.6947	NA
340	165837.4778	NA
341	396538.4322	NA
342	930696.9415	2
343	4775.0114	NA
344	9540.4079	NA
345	173124.1394	2
346	2202866.191	NA
347	9893.5503	2264586
348	80760.339	1
349	10865.5101	NA
350	1359734.8223	NA
351	1062799.9346	2587446
352	2076.4894	37
353	8533.6147	NA
354	1140926.9635	NA
355	239141.6906	881470
356	778695.8678	NA
357	224669.9894	NA
358	3297.8468	NA
359	115842.0083	NA
360	309102.5376	NA
361	5837219.7671	NA
362	303.8295	3757
363	217654.3986	NA
364	18773.8764	NA
365	4323912.9404	4224154
366	14120567.0095	4166996
367	165302.9624	1144077
368	1367719.3309	876202
369	4757690.6475	831029
370	2167243.995	704465
371	540906.4796	78888
372	54836.699	35559
373	82655.7662	26340
374	258103204.056	174751745
375	73698443.1709	134124714
376	101929730.168	79669432
377	72846665.3857	68714606
378	61840172.1504	59540103
379	49871944.6275	42074542
380	209958326.153	36423021
381	221118156.608	30068484
382	296308064.143	29523245
383	1608582.829	21665625
384	8132532.6086	19144080
385	31764000.7853	19097853
386	1061248.4452	15452947
387	370884646.444	12367970
388	30298236.4114	14379033
389	111337427.584	11904386
390	191518106.583	8336626
391	17480801.9152	7876324
392	19903867.5999	7876187
393	7378847.1888	7720269
394	29094.1792	7553009
395	459501.87	6438694
396	228004.9777	6225207
397	2884530.1634	5607665
398	17781338.5022	5378638
399	131970198.572	4994073
400	6916469.2302	4865007
401	131822.7996	2929277
402	993445.1614	2610214
403	1222595837.45	94955880
404	4441815.7546	1786142
405	33212348.1098	135520
406	3158364.3742	1095032
407	8896010.5215	1044120
408	33888.925	789610
409	1698234.7716	762668
410	798018.323	31213
411	4112410.222	752930
412	13336652.3965	748584
413	9209352.2931	635743
414	6978480.414	632556
415	69397989.2055	628605
416	6715615.2125	628078
417	10310888.569	616225
418	4546441.1206	566311
419	43066.9257	543922
420	8873112.6193	528861
421	7866998.9718	502173
422	4520480.3241	491110
423	6800187.3205	481094
424	48829977.2434	470960
425	4517341.6584	453832
426	6280582.7595	434479
427	6706729.3234	422216
428	2658020.6476	405373
429	42084063.8312	381272
430	4586346.5161	377977
431	4517626.6187	357332
432	4332738.8766	354405
433	4520672.6136	346125
434	4815672.2018	342947
435	5183629.3603	336099
436	541823.7378	335836
437	4049396.0485	320954
438	5557820.074	320427
439	6707391.8875	319818
440	4518221.6559	318048
441	6620525.0438	315925
442	2285553.6215	305676
443	2300096.3302	304246
444	6261614.3646	301725
445	4822248.791	299223
446	4803546.4336	292095
447	6013664.4209	287730
448	4514368.0929	275343
449	770003.8223	727682
450	2281483.2413	268147
451	4558377.0131	267203
452	4682981.3263	263532
453	4045872.8618	259845
454	3547388.213	254313
455	5197508.0345	253523
456	2324942.0576	253260
457	4180348.7256	246558
458	51930320.3461	245489
459	2281921.1498	245379
460	4517073.0998	234407
461	4914640.8493	233463
462	4516528.0357	232284
463	3351121.4346	232056
464	2299677.8845	230160
465	2140928.1066	228632
466	2284430.7883	228037
467	3727083.2363	221783
468	4487749.5615	221783
469	2358952.7755	224616
470	2472806.0229	210194
471	4124377.642	204004
472	2777182.8701	201501
473	4115392.5804	201140
474	2976036.7101	190834
475	2987658.6272	189253
476	2774781.9166	174503
477	2761212.3377	169893
478	2277768.8836	157909
479	1539050.0794	153958
480	2802063.3684	150270
481	3309254.9565	149233
482	2551018.6455	116201
483	4921545.1804	1549
484	2482247.1382	104168
485	3047219.8806	71222
486	1476.1478	53635
487	7511568.4126	41583
488	99738.1287	8471487
489	2251199.7789	14864
490	43991.888	3360
491	388.2003	1842
492	10096436.4144	8783843
493	5974.9744	1210
494	513687.4213	1119
495	4602192.1568	786
496	80544.4897	334
497	14951.4175	84
498	3560366.5604	23179244
499	7042664.2156	29
500	501356.7386	13
501	3066887.7492	-57
502	14951.4175	5
503	5408.23	2
504	1384056.6717	1
505	73809649.5083	1363229
506	14452.6546	NA
507	2765331.4899	9956958
508	2106884.3392	NA
509	993521.8143	NA
510	165185.6433	NA
511	1579188.1804	NA
512	851549.1509	NA
513	1009482.4975	NA
514	1155928.2341	NA
515	1379117.3725	NA
516	2928799.5416	465238
517	56660.2597	NA
518	1793731.6999	NA
519	468004.7133	NA
520	3781848.287	NA
521	7014010.5543	NA
522	1476.1478	NA
523	704333.7522	NA
524	2807704.8088	NA
525	119730312.696	705
526	348714.5522	NA
527	11186485.8854	NA
528	3759963.7092	NA
529	5516297.9759	NA
530	2281560.8375	NA
531	465.4628	NA
532	320877086.983	319056000
533	295479567.752	266134000
534	272431147.554	56407287
535	107143887.444	40029371
536	246391450.308	31716462
537	190973770.872	7961996
538	37522127.6052	24626045
539	226472491.877	139833
540	920405.6121	8393467
541	24292666.1605	17188173
542	24578531.1785	17430977
543	1620890.9972	11206592
544	13069091.6883	12296337
545	14797324.7076	10596000
546	29660586.8594	1923756
547	223226833.538	9251698
548	708226666.132	8413490
549	33253.9388	8100665
550	5273348.0806	6438600
551	397755.974	6890189
552	25442034.2318	6218914
553	1427.9307	6301284
554	423107.4022	4484000
555	277503.4519	4876134
556	16000169.253	5274600
557	3518404.5971	1845940
558	992900.7895	4475678
559	286855.4232	4319226
560	2318863.3081	3998665
561	1903.8428	3705390
562	256274976.878	2414600
563	45985901.7556	3206195
564	2922919.4329	2671666
565	4584240.1016	3914000
566	8362640.9169	2477947
567	5877679.196	3634000
568	213095172.299	1629304
569	548375.8434	1503671
570	1223545.3752	1350556
571	146619.2781	1234541
572	2371457.032	1083436
573	25076307.5974	896117
574	4686171.8409	811278
575	10432.4009	799986
576	9071585.0076	789832
577	17420.9873	4377527
578	16628331.2365	664481
579	3684087.646	593420
580	455562.0663	567312
581	50242610.7708	268652
582	67230593.8155	524400
583	8790089.1585	510315
584	324028.0173	757238
585	741855.5356	473000
586	1449094.0758	446323
587	7267000.0551	438781
588	8380409.7921	810720
589	139827910.687	397719
590	62781.0314	393997
591	3592997.872	37363
592	8344926.59	340391
593	41800308.5294	324739
594	3692146.8369	323701
595	72811.3212	307825
596	77277.6674	297862
597	3025156.857	297522
598	33722360.8213	262938
599	9470742.3796	257039
600	1072848.8347	254077
601	19602979.3931	254076
602	365702.3781	231650
603	2948563.7731	227710
604	576521.5321	224081
605	33884131.4765	221142
606	886505.9371	219915
607	646525.528	215239
608	1170692.0458	206233
609	1675917.3719	200575
610	1914209.7296	193121
611	3569426.1934	179497
612	388009.9271	185010
613	67989.7658	144511
614	5356406.0221	458195
615	28362.5311	136035
616	58965.5796	133570
617	62781.0314	133570
618	1019805.6902	129097
619	2354178.4513	127029
620	4562107.1338	107363
621	11361770.4224	100960
622	2108985.1189	97416
623	438841.1918	94922
624	2821277.7948	93762
625	55405784.9834	92770
626	25856.2836	82574
627	1818400.7387	69175
628	7346419.6301	61805
629	18598296.0908	59205
630	397759.771	58576
631	203989.1744	8827
632	567121.5816	54946
633	751309.9006	46953
634	253606.4385	35165
635	1019645.5826	33043
636	70528.188	32971
637	3287.3979	30272
638	32420.2622	29405
639	90.782	29380
640	229200.2026	28840
641	55752.2248	29689
642	1882939.9799	26587
643	248012.5648	25199
644	142724.1537	25181
645	113424.1371	23499
646	1377.0625	22794
647	90544.2356	20784
648	2098.965	17214
649	1900.9843	15269
650	1587314.1674	12341
651	54945.2898	10863
652	8338.7362	7448
653	316755.5262	7182
654	1930.5772	7006
655	8344.3367	6714
656	8344.3367	6331
657	925014.6912	5148
658	685511.3801	3906
659	1301866.7584	3255
660	614709.4062	2404
661	125609.9967	2239
662	45.391	1812
663	942.3051	393
664	92990988.6155	NA
665	47780.4603	NA
666	77306.3688	NA
667	1997939926.37	42481646
668	10828.2584	NA
669	751880.6412	21787523
670	585977.0151	22727808
671	175568.4659	658743
672	77652.0587	-2
673	7599774.1798	20529
674	164777.9645	9042800
675	90.782	NA
676	114252.6019	NA
677	169817029.366	NA
678	3168199.4235	859900
679	1347642.3795	NA
680	142724.1537	953397
681	3523222.1502	999646
682	10828.2584	NA
683	211873520.495	66212000
684	6908872.0894	3279000
685	69518.6652	106759
686	3012490.0406	1656000
687	2394122.1668	3018138
688	36325855.0503	262259
689	491502653.183	42601390
690	6303253.7477	NA
691	98867.4207	NA
692	614709.4062	NA
693	307951.2908	130004
694	6196447.9924	NA
695	934371.443	39476
696	4443018.8564	174
697	599797.056	48
698	458576.1608	NA
699	301624.6713	NA
700	21179.8779	NA
701	83752542.2829	316100
702	55474.1031	NA
703	775704.4568	629932
704	2964.6691	NA
705	1574561.1174	NA
706	337627.55	NA
707	60879411.5355	1877318
708	79584.7196	804650
709	597387.7721	77413
710	1213796.5948	NA
711	25442028.793	NA
712	418253.4735	NA
713	24808.7792	85588
714	453899.116	NA
715	6794897.8905	4766205
716	20109499.0516	1222959
717	2428177.2455	NA
718	114958.1188	NA
719	3987512.3917	1670000
720	83752542.2829	2155400
721	845043.1227	401100
722	2094737.3495	NA
723	34522924.9851	108162
724	5305514.9061	39
725	3291093.2742	3095500
726	7204.6682	1269
727	81162.2813	4
728	685511.3801	NA
729	79945.7479	10
730	3223202.8102	NA
731	38653.1855	NA
732	5624550.787	NA
733	11730948.4169	875
734	379484.6884	NA
735	142904.4304	3102
736	1868445.8986	NA
737	2310737.0823	5708453
738	2217653.1064	NA
739	349082.4455	NA
740	1418969.0348	NA
741	614709.4062	NA
742	3500536.2679	NA
743	7346419.6301	NA
744	443937.5206	NA
745	460345.9591	NA
746	21577288.628	1166438
747	23698579.4678	130
748	4232169.8914	NA
749	73984.2671	NA
750	597387.7721	NA
751	1095766.5738	NA
752	213007897.374	NA
753	9470742.3796	NA
754	945139.2344	NA
755	977427.6055	2942746
756	286425.3219	150416
757	38653.1855	NA
758	21509.2079	64
759	8362640.9169	NA
760	27574.1329	NA
761	14038.0064	NA
762	8344.3367	NA
763	11027880.2198	NA
764	142904.4304	NA
765	1202.0206	NA
766	207014.1935	NA
767	28336007.4231	NA
768	28336007.4231	NA
769	5281153.7456	NA
770	5556059.0027	NA
771	2759826.7457	56815
772	435616.1385	309284
773	69276132.9534	46217267
774	11752014.6143	42338346
775	269272053.525	21797338
776	2460756.7111	23041
777	226757.0896	39
778	23617483.9884	NA
779	6595.3005	NA
780	27163.0752	NA
781	146155561.322	25792077
782	4638933.2128	2921112
783	33781265.2303	27004309
784	19249449.9298	1747251
785	6082484.7856	2554556
786	5932812.4041	5425611
787	10166973.8375	4558868
788	225826.6538	2321062
789	1856632.3316	1198296
790	8167510.9116	600076
791	1856632.3316	102000
792	8167510.9116	NA
793	132551150.039	83171342
794	20561470.1388	6985030
795	11596531.7393	7434479
796	194584163.845	31767154
797	111754550.63	24072172
798	23022332.5376	13137495
799	7047794.2482	11843804
800	1545851.1673	11480311
801	137806.4339	9267050
802	14013002.0467	8320922
803	18051704.0512	6033057
804	1157403.9857	7835542
805	47879.1838	5976294
806	32829.8556	5802713
807	669045.7166	5218622
808	5552589.4782	4540893
809	1360708.1972	4272299
810	3327473.7226	5556327
811	11060837.5815	4126959
812	1216541.8896	3880548
813	1135985.4892	3332075
814	896238.76	2787567
815	638170.8098	395642
816	289931.6465	2555117
817	2576431.5252	2401027
818	1378062.3338	2208086
819	23129.3282	1702313
820	74572.4706	1445542
821	549814.0957	1345055
822	2326444.4029	1263137
823	242921.5561	1169762
824	98867.7842	1165784
825	106463.5883	1119584
826	228830.0827	1071777
827	58429.614	904649
828	5617701.185	1955629
829	6381465.5975	792704
830	1540342.0605	751745
831	390690.1985	702621
832	83838.6285	1319284
833	71456.2306	653102
834	2706929.1901	640590
835	43352366.4407	2044877
836	695601.9779	610036
837	131823.4459	571213
838	61444.4902	498189
839	130623.9483	486764
840	11341.9306	457132
841	3185903.9404	452887
842	7578.9688	374556
843	2083622.5755	329265
844	73469.2544	315290
845	9868137.5657	310681
846	59279.4413	268358
847	1723824.6162	258336
848	4607413.9427	4412485
849	242952.4196	232056
850	6267.1428	222610
851	892546.2001	206901
852	14550.3317	200184
853	1666171.2955	195707
854	85951.4734	171605
855	79900.6891	171079
856	135773.0311	162650
857	5703556.2742	155603
858	8535903.3325	151587
859	32155.53601	123403
860	14292.04731	84585
861	579797.9533	82000
862	1290009.5361	78804
863	51889.9377	75018
864	3772.6887	53075
865	443.2245	32678
866	4494455.6622	20000
867	21527.0695	11583
868	474195.261	5525
869	23078113.7731	13137495
870	5967.4659	2582
871	7977867.9184	2442
872	1063700.1863	493
873	242528.8389	153
874	6681433.3719	5399447
875	41610.1647	11
876	233141705.708	203553685
877	320057887.438	34023799
878	29590922.5615	26946876
879	50393240.3139	26081640
880	29294281.9388	21547811
881	52900429.031	20074798
882	77235854.6947	18364641
883	49750480.9209	16361241
884	33388373.9299	14600085
885	12315955.9941	9583136
886	6965509.078	8223169
887	178565788.865	7849554
888	131124474.136	7171271
889	32725423.0322	6778581
890	2575298.3084	5538394
891	62906540.7356	4617935
892	114295572.016	4557586
893	98697196.0666	4478538
894	87442640.6982	3675308
895	76217347.5901	3425414
896	73544329.4919	2878878
897	958586.51	1406715
898	5974718.7775	1158521
899	281263.1509	501440
900	3060507.8951	452000
901	87275351.573	380041
902	4021855.9022	351041
903	234490754.45	270293
904	208014777.942	243944
905	34779.4186	122050
906	429183.3432	58552
907	3646152.1521	2410773
908	1353738.336	332543
909	8092.1736	NA
910	187336150.716	186153036
911	59291026.5194	59096536
912	4873537.3236	4871592
913	4952213.0154	4735333
914	3149928.9919	1499081
915	2564493.6306	142763
916	3029089.9441	121000
917	43378.1529	66391
918	2123040.3115	41287
919	1818.3353	NA
920	18408.3589	NA
921	1063.2922	NA
922	3582916.8772	NA
923	139614050.092	28805479
924	195339021.968	32155933
925	141706395.797	18006058
926	152686506.156	32358751
927	44858231.1283	18835770
928	8720083.5213	NA
929	155625.9257	NA
930	21689.0767	4315359
931	2485865.6302	1705518
932	6119035.4605	7082313
933	6091372.7823	703674
934	810898.8223	61681812
935	23957.8266	970661
936	31956.4631	970661
937	180656.9864	222178
938	185429.7525	446332
939	1143939.463	18510470
940	4028755.2818	NA
941	178993.9421	NA
942	34181.635	45
943	31956.4631	NA
944	26917.3163	NA
945	265554.4371	NA
946	12086277.9315	2119081
947	791352.3856	NA
948	4028756.8832	NA
949	11994322.8421	NA
950	45171212.0178	67288
951	3149.424	NA
952	218359.9073	NA
953	1623.4145	NA
954	1202472.6845	NA
955	423783.47	NA
956	165531.8615	NA
957	10912704.4649	4535095
958	38653.1855	14
959	176509.901	NA
960	133988.1567	NA
961	78965.9873	NA
962	1945.3239	NA
963	11355878.0369	8415815
964	23944519.3021	4551597
965	177403.0897	3649503
966	2687254.7337	2992173
967	250987.903	2096709
968	3523002.9011	1469537
969	6593988.0153	1204371
970	1736639.6415	358946
971	1565658.4186	323003
972	7092.1356	303850
973	1565335.5224	278914
974	285119.7397	150860
975	605402.4238	605038
976	844713.1027	73985
977	3869.03998	73434
978	4.8963	66773
979	285340.2762	32319
980	252.7239	24984
981	48399.3794	16178
982	1637.5025	13770
983	3868.07	10450
984	14040.851	8546
985	6228.2015	5213
986	887.8569	2521
987	0.00091457	56
988	12456.4031	8
989	2.0334	NA
990	4.0668	NA
991	13909.8112	NA
992	15144793.8104	14645314
993	9557021.8618	8353677
994	8232545.1878	6516052
995	4992009.6553	3359805
996	4850781.144	2152772
997	0.0020636	1456210
998	2436519.687	1324114
999	634884.135	1151067
1000	1978872.7836	1131551
1001	0.21921	883212
1002	12740.3623	507309
1003	5538.4666	506783
1004	295.9864	196628
1005	175872.100643	172954
1006	3903.5404	129060
1007	2169.7129	124459
1008	16053.4407	69933
1009	63729.3522	48477
1010	287903.1233	17244
1011	175.3317	9102
1012	671546.8601	7869
1013	65868.3812	4876
1014	75793.4442	3797
1015	108794.1693	26
1016	6373.1609	NA
1017	89264.0969	NA
1018	634722.7181	1386277
1019	80322032.2088	9453444
1020	43674300.0356	5575903
1021	21227107.1557	4306381
1022	52404518.1374	4249126
1023	7814305.0597	3296766
1024	3880597.8493	2190414
1025	96450.9277	2115049
1026	22889615.737	101836
1027	3115909.3663	449563
1028	1452876.5812	340958
1029	1989142.9242	389526
1030	2732729.7413	315114
1031	4169519.8886	290612
1032	4865086.1552	278034
1033	13216322.1681	1739948
1034	13388773.0542	134851
1035	2699790.9745	65088
1036	14819719.9854	45921
1037	84437.5053	31824
1038	47241.2914	21469
1039	221061962.877	207349000
1040	217626672.273	163391000
1041	199380111.591	89861000
1042	328348182.529	72580000
1043	105361918.539	88400000
1044	813358261.545	61437000
1045	72161221.035	22953000
1046	88497609.7757	88144000
1047	276107446.155	47648000
1048	71517081.5405	65449000
1049	54092.6929	63602000
1050	109256.3163	41978000
1051	29820965.4838	29242000
1052	106059417.754	35691000
1053	109830414.434	29794000
1054	194389198.635	17583000
1055	163228.6578	3.1e+07
1056	43086056.8973	42879000
1057	323237.6288	42156000
1058	358593106.705	37665000
1059	495584568.082	34659000
1060	365141318.536	34614000
1061	135028982.5	29779000
1062	32944169.6668	31367000
1063	32023561.0751	28982000
1064	15619934.4896	1.5e+07
1065	22189814.9639	22147800
1066	50076188.5328	13587000
1067	24527938.7389	17562500
1068	5200376.6216	15940400
1069	13914879.144	13178000
1070	30911658.4286	8128900
1071	23928818.4253	8622500
1072	113654526.846	11921000
1073	6572500.8044	5981000
1074	14320714.1947	10964800
1075	38320303.1164	8572000
1076	341338.022	10716000
1077	341338.022	10640362
1078	341338.022	10575205
1079	124603.5325	8406900
1080	36242412.2943	4586100
1081	2917787.1003	6302225
1082	42279122.0021	9227200
1083	42580443.6056	1406000
1084	151703372.26	8140000
1085	8605420.0015	5026000
1086	2238612.4765	5415500
1087	55110928.1676	4942000
1088	345394.8416	7421153
1089	875155458.613	6327000
1090	4288548.0016	3405700
1091	415040609.636	5550859
1092	5478875.9862	3163000
1093	18563345.3482	4628979
1094	518126.2278	5518100
1095	156710.168	2863400
1096	310835789.267	2681100
1097	84965566.1044	4309000
1098	4417249.5639	2838000
1099	2801505.1786	2563100
1100	1438574.7975	16694000
1101	273554991.951	2994670
1102	479623.4538	2163800
1103	1373768.1426	3337500
1104	2043.5752	2519529
1105	20030.216	2780000
1106	390707.4722	1580300
1107	97266.1973	3339900
1108	6487653.0136	931200
1109	879240.8133	2536200
1110	33263.5831	2392000
1111	12264405.5525	2336100
1112	31521790.8128	2097976
1113	35986.4193	1582875
1114	518126.2278	1995400
1115	6863141.6356	1120279
1116	466334.4129	1457600
1117	1925816.5714	1880222
1118	2252474.4793	1521304
1119	314988709.586	1886700
1120	1870142.4587	1791000
1121	6242536.4843	2236194
1122	5262463.9307	1547743
1123	592368.0163	647740
1124	5262463.9307	3902100
1125	165404.2172	883350
1126	1508852.0836	1175749
1127	141934516.797	1170353
1128	151326.3692	751478
1129	21041.3041	455900
1130	7129893.4457	852953
1131	129825481.222	1026700
1132	5256526.1286	709089
1133	1683.84502	627999
1134	140833.6769	1007904
1135	26587800.6178	978858
1136	639516.3	707576
1137	7927629.8185	911000
1138	13616442.2329	1727197
1139	99910975.362	862194
1140	17208.8529	844678
1141	150407.2529	618800
1142	63610.0879	463200
1143	30928.2732	831883
1144	10841.4266	361100
1145	5262463.9307	747000
1146	24749130.1167	718655
1147	76186096.7934	697400
1148	51654.8683	714831
1149	483291.2697	15939000
1150	348886.5137	340101
1151	30981.5662	467000
1152	749306.3598	586394
1153	1460007.3351	473803
1154	999528.3949	395178
1155	628814.2553	592000
1156	2357.1844	640280
1157	5476163.6274	886191
1158	4271629.1567	535237
1159	82461.1632	342700
1160	32582886.37	485172
1161	38048.9269	302810
1162	494690.8986	451800
1163	12242550.9307	344800
1164	12592509.401	443000
1165	1018966.7617	673994
1166	9446.8797	277909
1167	39278305.2609	395000
1168	41710.4247	221200
1169	4000.3002	212101
1170	26156258.631	373555
1171	24940.7744	361000
1172	18200.5939	634242
1173	1473955.3476	326500
1174	21741655.0864	318000
1175	184360.6454	1191386
1176	92484.2824	183204
1177	104014.6719	201402
1178	6338.5738	299147
1179	3517665.0931	852734
1180	19723011.7448	261463
1181	84459.5792	147332
1182	1888.0641	216574
1183	17230888.5419	245000
1184	1317240.7922	227000
1185	25037.1804	149986
1186	1464963.8415	191472
1187	534290.0467	190000
1188	11345699.8738	183000
1189	41971710.3729	176000
1190	18400221.3584	169000
1191	207484287.099	149000
1192	1033.136	84940
1193	901580.7954	138000
1194	207484287.099	137000
1195	55884.9012	135000
1196	4455.2246	86882
1197	17163134.6095	130000
1198	18.3612	90964
1199	49466.3801	116000
1200	5200376.6216	114000
1201	831.9286	87968
1202	345146.3948	103000
1203	697126.0157	103000
1204	1206877.6824	96000
1205	2887301.7755	95000
1206	69.8167	44903
1207	32290.2575	55107
1208	111912.7594	107072
1209	4551283.5735	67000
1210	23.7314	51660
1211	1877.15101	37319
1212	1053445.497	56000
1213	24505.6715	27549
1214	263414.6893	48000
1215	399042.3567	70222
1216	311055.9207	44853
1217	37254.1048	43000
1218	68463.0943	38000
1219	1520346.2494	37000
1220	323237.6288	40152000
1221	8582.682	39356
1222	5101348.3099	35000
1223	741905.6827	33000
1224	1937199.5658	34400
1225	577792488.707	2037633
1226	551997.1683	29994
1227	6724345.2676	28000
1228	6332943.4227	27364
1229	12541013.6937	25000
1230	12977697.487	21000
1231	6209270.7561	21000
1232	3465468.2701	19000
1233	51796718.7469	18000
1234	602737.3935	17000
1235	408986.1929	16000
1236	70018.3506	15000
1237	1389676.365	15000
1238	7827704.4985	14000
1239	408986.1929	14000
1240	10302243.3985	12000
1241	111087.6278	11000
1242	579000.0635	11000
1243	247987.4931	11000
1244	1305781.6488	10231
1245	6897359.0676	10000
1246	5200376.6216	9000
1247	40960.0915	9233
1248	462241.5761	8000
1249	9309091.6979	8000
1250	95512862.4171	8000
1251	247987.4931	7696743
1252	3293516.7358	7000
1253	976006.2482	6000
1254	2215727.5891	6000
1255	669082.1818	6000
1256	1371775.156	5000
1257	363544.1834	5000
1258	830853.8095	5000
1259	135352426.189	5000
1260	49.4667	5000
1261	20698692.8391	5000
1262	4706877.0363	5000
1263	2284094.1001	5000
1264	25171238.9712	5000
1265	3319689.1972	4000
1266	363544.1834	3000
1267	1604227.2771	3000
1268	505252.0921	3000
1269	758411.0244	3000
1270	2046.322	3000
1271	31143107.5238	6058972
1272	397755.974	3000
1273	1014217.3844	2000
1274	786494.7552	2000
1275	257402.8166	2000
1276	36803.4273	2000
1277	6087986.5282	2000
1278	53146.8636	2000
1279	741905.6827	2000
1280	6425581.4125	1000
1281	257402.8166	1000
1282	406008.8005	1000
1283	2328487.0271	1000
1284	1371775.156	1000
1285	147924.4709	406081
1286	6408923.5938	NA
1287	217710.856	NA
1288	3464.8849	NA
1289	17474185.4036	NA
1290	84527.0101	NA
1291	841863.6769	NA
1292	463673.2241	NA
1293	1598307.5885	NA
1294	18400221.3584	NA
1295	4060975.776	NA
1296	60082.597	NA
1297	8742766.4752	6871019
1298	11968166.7026	3238307
1299	3200479.1127	2990387
1300	9338169.7146	7643096
1301	7607748.1529	1924103
1302	7607748.1529	1911621
1303	2396683.7694	1116701
1304	734011.0493	893233
1305	3671495.9035	718717
1306	49980.1192	653683
1307	5937.8007	607285
1308	1162200.2032	1064993
1309	366238.9462	92193
1310	2834141.6335	69082
1311	40589.5231	26413
1312	103896.5596	11000
1313	166375.9261	10000
1314	6484462.3722	2269
1315	729953.6753	NA
1316	109427.1362	NA
1317	36475.7373	NA
1318	103896.5596	NA
